# Supplementary material for: Development of a coarse-grained model for surface-functionalized gold nanoparticles: towards an accurate description of their aggregation behavior
Source: Royal Society of Chemistry journal article supplement (doi:10.1039/d3sm00094j), 2023-01-01
Supplement: d3sm00094j2.zip [file d3sm00094j2.zip]

Soft Matter
